# Supplementary material for: A hybrid 3D-printed aspirin-laden liposome composite scaffold for bone tissue engineering
Source: Royal Society of Chemistry journal article supplement (doi:10.1039/c8tb02756k), 2018-12-21
Supplement: c8tb02756k1.pdf [file c8tb02756k1.pdf]

**Supporting Information**

**A hybrid 3D-printed aspirin-laden liposome composite scaffold  
for bone tissue engineering**

Yan Li,<sup>a,b</sup> Yanjie Bai,<sup>\* c</sup> Jijia Pan,<sup>a</sup> Hui Wang,<sup>d</sup> Hongming Li,<sup>e</sup> Xiao Xu,<sup>b</sup> Xiaoming Fu,<sup>b</sup>

Rui Shi,<sup>b</sup> Zuyuan Luo,<sup>a</sup> Yongliang Li,<sup>b</sup> Qian Li,<sup>a</sup> Jerry Y H Fuh<sup>d</sup> and Shicheng Wei<sup>\* a,b</sup>

<sup>a</sup> Laboratory of Biomaterials and Regenerative Medicine, Academy for Advanced  
Interdisciplinary Studies, Peking University, Beijing 100871, China

<sup>b</sup> Central Laboratory and Department of Oral and Maxillofacial Surgery School and  
Hospital of Stomatology, Peking University, Beijing 100081, China

<sup>c</sup> Department of Stomatology, Peking University Third Hospital, Peking University,  
Beijing 100191, China

<sup>d</sup> National University of Singapore Suzhou Research Institute, Suzhou 215123, China

<sup>e</sup> College of Life Science, Mudanjiang Normal University, Mudanjiang 157011, China

**\* Corresponding Author**

Dr. Yanjie Bai

Department of Stomatology, Peking University Third Hospital, Peking University,  
Beijing 100191, China

Tel & Fax: 01082266889; E-mail: yanjiebai@126.com

- 1 Prof. Shicheng Wei
- 2 Laboratory of Biomaterials and Regenerative Medicine, Academy for Advanced
- 3 Interdisciplinary Studies, Peking University, Beijing 100081, China
- 4 Tel & Fax: +86 10 82195771; E-mail: sc-wei@pku.edu.cn
- 5

1

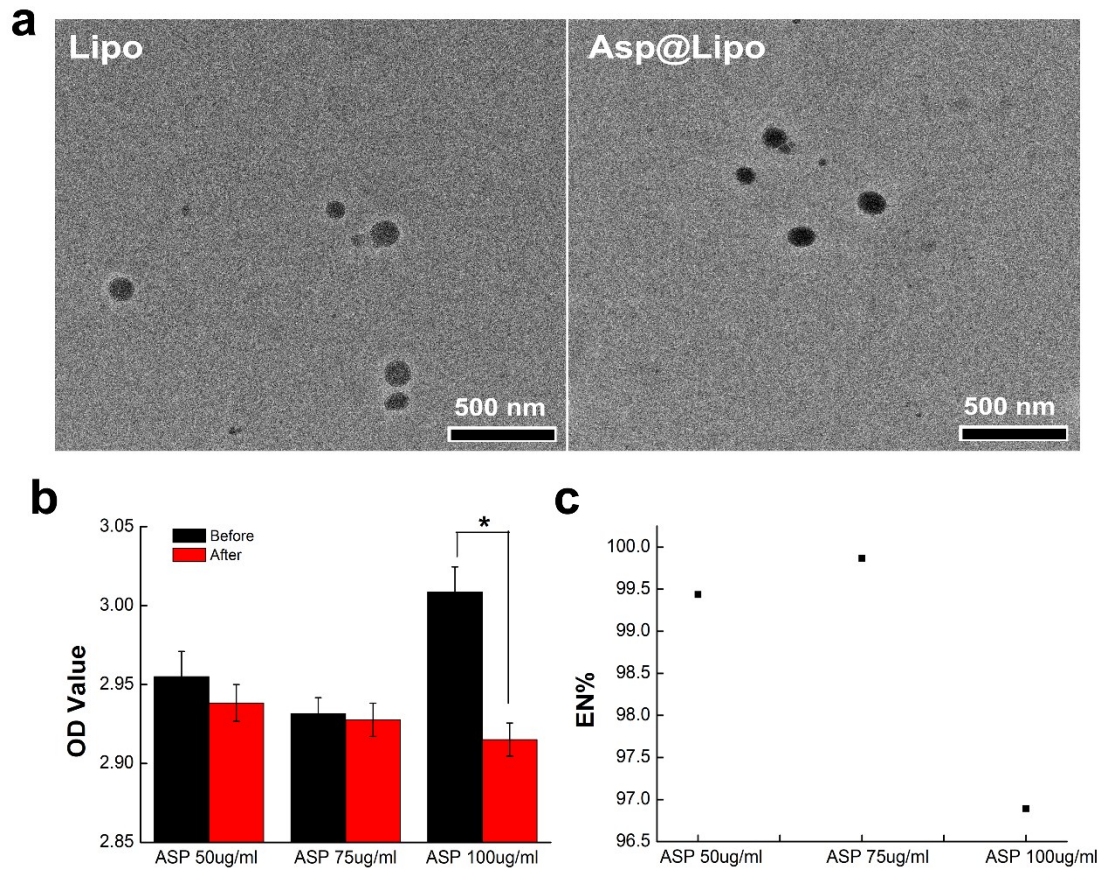

2

3

4 **Fig. S1.** (a) TEM images of liposomes (Lipo) and aspirin-loaded liposomes  
 5 (Asp@Lipo), (b, c) the encapsulation efficiency (EE) of aspirin (50, 75, 100 ug/ml) in  
 6 liposomes. (\*)  $p < 0.05$ . Results are representative of at least three independent  
 7 experiments.

8

1

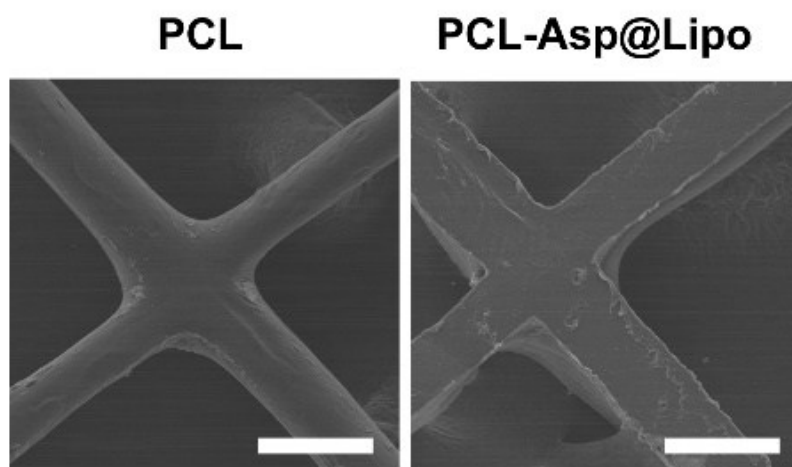

2

3 **Fig. S2.** SEM images of morphology of pristine and functionalized PCL scaffold  
4 surfaces. Scale bars indicate 100 μm.

5

1

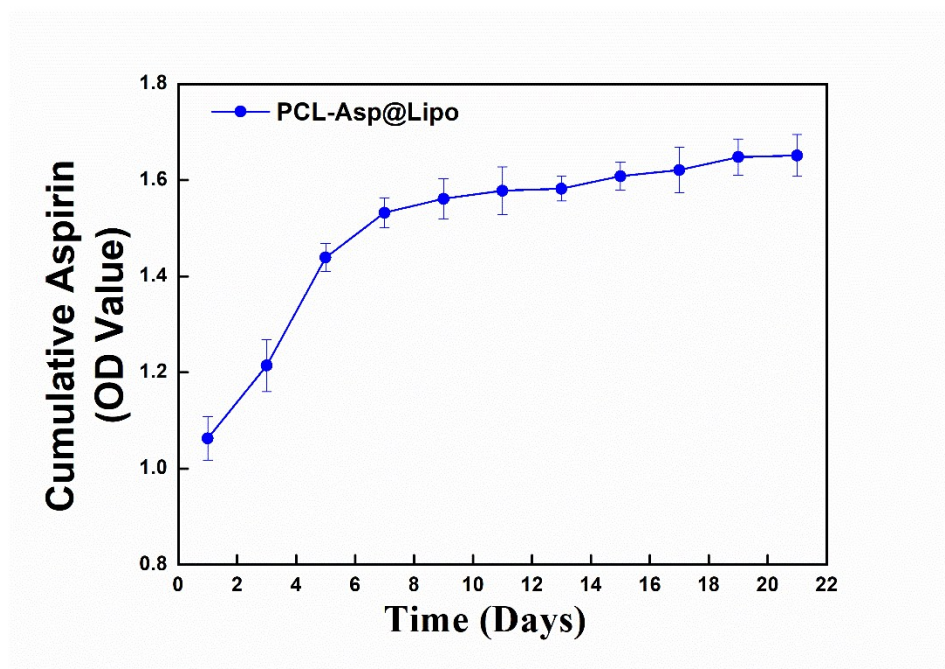

2

3 **Fig. S3.** In vitro cumulative release of aspirin from Asp@Lipo immobilized on the  
4 surface of PCL substrates.

5

1

**Table S1.** Primer sequences used for RT-PCR analysis

| <b>Genes</b>   | <b>5'-3'</b> | <b>Primes</b>          |
|----------------|--------------|------------------------|
| <b>Colla1</b>  | forward      | AGACACTGGTGCTAAGGGAGAG |
|                | reverse      | GACCAGCAACACCATCTGCG   |
| <b>OCN</b>     | forward      | CCTGAAAGCCGATGTGGT     |
|                | reverse      | AGGGCAGCGAGGTAGTGA     |
| <b>ALP</b>     | forward      | CAACCCTGGGGAGGAGAC     |
|                | reverse      | GCATTGGTGTGTACGTCTTG   |
| <b>Runx2</b>   | forward      | AGGAATGCGCCCTAAATCACT  |
|                | reverse      | ACCCAGAAGGCACAGACAGAAG |
| <b>OPG</b>     | forward      | CTGGAACCCCAGAGCGAAAT   |
|                | reverse      | GCCTCCTCACACAGGGTAAC   |
| <b>RANKL</b>   | forward      | GGTTGGGCCAAGATCTCAA    |
|                | reverse      | TCCGGATCCAGTAAGGAGGG   |
| <b>β-actin</b> | forward      | CCCAGAGCAAGAGAGG       |
|                | reverse      | GTCCAGACGCAGGATG       |

2
